1

2

3

4 **High-efficiency optogenetic silencing with soma-targeted anion-**  
5 **conducting channelrhodopsins**

6

7

8

9 Mathias Mahn, Lihi Gibor, Katayun Cohen-Kashi Malina, Pritish Patil, Yoav Printz, Shir Oring, Rivka Levy,  
10 Ilan Lampl and Ofer Yizhar

11

12 Department of Neurobiology, Weizmann Institute of Science, Rehovot, Israel

13

14

15

16 Corresponding author:

17 Ofer Yizhar, Ph.D.

18 Department of Neurobiology

19 Weizmann Institute of Science

20 234 Herzl st, Rehovot 7610001

21 Israel

22 Tel. +972-8-9346957

23 [ofer.yizhar@weizmann.ac.il](mailto:ofer.yizhar@weizmann.ac.il)

## 24 **Abstract**

25 Optogenetic silencing allows time-resolved functional interrogation of defined neuronal populations.  
26 However, the limitations of inhibitory optogenetic tools impose stringent constraints on experimental  
27 paradigms. The high light power requirement of light-driven ion pumps and their effects on intracellular  
28 ion homeostasis pose unique challenges, particularly in experiments that demand inhibition of a  
29 widespread neuronal population *in vivo*. *Guillardia theta* anion-conducting channelrhodopsins (GtACRs)  
30 are promising in this regard, due to their high single-channel conductance and favorable photon-ion  
31 stoichiometry. However, GtACRs show poor membrane targeting in mammalian cells, and the activity of  
32 such channels can cause transient excitation in the axon due to an excitatory chloride reversal potential  
33 in this compartment. Here we address both problems by enhancing membrane targeting and subcellular  
34 compartmentalization of GtACRs. The resulting GtACR-based optogenetic tools show improved  
35 photocurrents, greatly reduced axonal excitation, high light sensitivity and rapid kinetics, allowing highly  
36 efficient inhibition of neuronal activity in the mammalian brain.

37

## 38 **Introduction**

39 Perturbation of neuronal activity is a fundamental aspect of neuroscience research, often used to gain  
40 insight into the functional roles of particular brain regions, circuits and cell types<sup>1</sup>. Optogenetic tools  
41 have greatly enhanced the precision with which such manipulations can be performed<sup>2</sup>, providing both  
42 temporal precision and cell-type specificity to experiments aimed at defining the roles of individual  
43 neural circuit components in neural computation or animal behavior. Current optogenetic approaches  
44 for silencing of neurons are mainly based on the light-activated microbial rhodopsins halorhodopsin<sup>3,4</sup>,  
45 archaerhodopsin<sup>5</sup> and cruxhalorhodopsin<sup>6</sup>. These proteins pump ions across the neuronal membrane  
46 with millisecond kinetics, independently of the electrochemical gradient. These tools allow neuronal  
47 silencing with precise temporal onset and offset<sup>5,7,8</sup>. However, ion-pumping rhodopsins possess several  
48 characteristics that impose substantial constraints on the experimental paradigm and complicate the  
49 interpretation of experimental outcomes. These limitations become even more pronounced in cases  
50 where neuronal silencing is required for extended periods of time. The unfavorable stoichiometry of one  
51 transported ion for each absorbed photon necessitates continuous illumination at high light power. The  
52 resulting tissue heating<sup>9,10</sup> and phototoxicity<sup>11</sup> restrict the optically addressable brain volume that can  
53 be efficiently silenced. Furthermore, ion-pumping microbial rhodopsins exhibit a decline in photocurrent

54 amplitudes of up to 90% within a minute of illumination, leading to reduced silencing efficacy over time  
55 <sup>12,8,13</sup>. Because of their insensitivity to electrochemical gradients, ion-pumping microbial rhodopsins can  
56 shift the concentrations of intracellular ions to non-physiological levels. In the case of halorhodopsin,  
57 this can lead to accumulation of chloride in the neuron, inducing changes in the reversal potential of  
58 GABAergic synapses <sup>14</sup>. While in the case of archaerhodopsin this can increase the intracellular pH,  
59 inducing action potential-independent  $\text{Ca}^{2+}$  influx and elevated spontaneous vesicle release <sup>13</sup>.  
60 Furthermore, the hyperpolarization mediated by ion-pumping activity together with the fast off kinetics  
61 can lead to an increased firing rate upon termination of the illumination <sup>6,13</sup>.

62 Anion-conducting channelrhodopsins (ACRs), a newly established set of optogenetic tools <sup>15,16,17</sup>, are  
63 distinct from ion-pumping rhodopsins in two major aspects: first, they can conduct multiple ions during  
64 each photoreaction cycle. This increased photocurrent yield per photon makes channelrhodopsins  
65 superior in terms of their operational light-sensitivity. Second, conducting ions according to the reversal  
66 potential, ACRs are more likely to avoid non-physiological changes in ion concentration gradients. A  
67 light-gated chloride conductance will shunt membrane depolarization, which can be used to effectively  
68 clamp the neuronal membrane potential to the reversal potential of chloride, given that the ion  
69 permeability is sufficiently high. Anion-conducting channelrhodopsins could therefore relieve constraints  
70 imposed by ion-pumping rhodopsins. The naturally-occurring anion-conducting channelrhodopsins  
71 (nACRs) from the cryptophyte alga *Guillardia theta* <sup>16</sup> are particularly interesting in this regard. These  
72 channelrhodopsins, named GtACR1 and GtACR2, have near-perfect anion selectivity and produce large  
73 photocurrents in mammalian cells, owing to a higher single-channel conductance than that of the known  
74 cation-conducting channelrhodopsins <sup>16,18</sup>. While GtACRs were shown to inhibit behavior in the fruit fly  
75 <sup>19,20</sup> and larval zebrafish <sup>21</sup>, they have not yet been applied to mammalian systems, most likely due to  
76 poor membrane targeting and complex activity in the axonal compartment. To overcome these  
77 limitations of GtACRs and thereby of optogenetic inhibition in general, we generated several membrane  
78 targeting-enhanced GtACR variants, converging onto soma-targeted GtACR2 (stGtACR2), a fusion  
79 construct that combines GtACR2 with a C-terminal targeting motif from the soma-localized potassium  
80 channel Kv2.1 <sup>22</sup>. We demonstrate here that stGtACR2 shows increased membrane targeting, extremely  
81 high anion photocurrents and reduced axonal excitation, making it the most effective tool for  
82 optogenetic inhibition at the cell soma to date.

## 84 Results

### 85 GtACR2 efficiently silences neuronal activity *in vitro* and *in vivo*

86 To determine the utility of ACRs for silencing of neurons we first expressed the three previously-  
87 described blue light-activated ACRs, GtACR2<sup>16</sup>, iC++<sup>17</sup>, and iChloC<sup>15</sup>, in cultured rat hippocampal  
88 neurons by adeno associated virus (AAV)-mediated gene transfer. Whole-cell patch-clamp recordings  
89 from GtACR2-expressing neurons showed reliable outward photocurrents (Fig. 1a) in response to 470  
90 nm full field light pulses. The photocurrent after 1 s of continuous illumination (stationary photocurrent)  
91 of GtACR2 expressing neurons clamped to -35 mV was significantly higher than that of the engineered  
92 ACRs (eACRs) iC++ and iChloC ( $628.5 \pm 61.8$  pA,  $330.2 \pm 37.9$  pA, and  $136.3 \pm 21.4$  pA, respectively; Fig.  
93 1b). Given the poor membrane targeting and intracellular accumulation of GtACR2 (Fig. 1c), the high  
94 single-channel conductance of GtACR2<sup>16</sup> is likely the cause for the high photocurrents observed in the  
95 whole-cell recordings. While the native GtACR2 seems to outperform the previously-described eACRs,  
96 the above findings suggest that improved membrane targeting of GtACR2 would greatly facilitate  
97 silencing of neuronal activity. Importantly, this should allow efficient silencing by using significantly  
98 lower light power, enabling optogenetic control of a larger brain volume.

99 To verify this prediction, we characterized the efficiency of GtACR2-mediated inhibition in awake,  
100 behaving mice with extracellular recordings (Fig. 1d-g). To quantify the efficiency of silencing in a large  
101 cortical volume, we recorded from mice expressing GtACR2 in pyramidal neurons in the medial  
102 prefrontal cortex (mPFC). Mice were implanted with movable fiberoptic-coupled microwire arrays in  
103 which electrodes were placed 500  $\mu\text{m}$  below the optical fiber tip (Fig. 1d). Using analytical modeling of  
104 light scattering and absorption in brain tissue<sup>23</sup> we estimated the light power density at the position of  
105 the extracellular recording site to be 0.11% of the light power density exiting the optical fiber  
106 (Supplementary Fig. 1). Single-unit recordings showed a significant reduction in neuronal firing rates in  
107 response to a 5 s 460 nm light pulse (Fig. 1e-h). These recordings showed that out of 100 single units  
108 recorded ( $n = 2$  mice, 12 recording sites), 43% and 35% significantly reduced their firing rate at the  
109 second highest and highest tested light power densities ( $0.5$  and  $1$   $\text{mW mm}^{-2}$ , respectively; Fig. 1f). Half  
110 of the silenced units showed a significant firing rate reduction already at the lowest tested light power  
111 density ( $125$   $\mu\text{W mm}^{-2}$ ), with some units completely silenced (Fig. 1e, h). At the highest light intensity,  
112 silenced units showed pronounced rebound activity upon light pulse termination (Fig. 1g). Notably, all  
113 light power densities used were well below the necessary light powers for *in vivo* optogenetic inhibition

114 using microbial ion-pumps<sup>8,6</sup>, indicating that GtACRs can serve as potent inhibitory optogenetic tools for  
115 somatic silencing in mammalian neurons.

### 116 **Activation of ACRs in the axonal compartment induces antidromic action potentials**

117 We have previously shown that GtACR1 can induce vesicle release from thalamocortical projection  
118 neurons upon illumination of their axonal terminals in the acute brain slice<sup>13</sup>. Malyshev and colleagues  
119 24 demonstrated a similar effect in GtACR2-expressing cortical pyramidal neurons in acute brain slices.  
120 To verify that this excitatory action of GtACRs is not an artifact of the acute brain slice preparation, we  
121 evaluated the excitatory effect of ACRs in two separate preparations: in cultured hippocampal neurons  
122 and in awake, freely moving mice. Whole-cell patch-clamp recordings in current-clamp mode from  
123 GtACR2-expressing cultured neurons revealed that during a 100 ms long illumination pulse, GtACR2  
124 reliably inhibited action potential (AP) generation (Fig. 2a). However, this was often associated with  
125 what appeared to be an attenuated AP shortly after light onset ('escaped AP', Fig. 2a, inset). When  
126 recorded in voltage-clamp mode, escaped APs were measured in 6 out of 12 tested GtACR2-expressing  
127 neurons in response to 1 ms light pulses at saturating light power (4.5 mW mm<sup>-2</sup>). These escaped spikes  
128 occurred even when the recorded photocurrent was an outward current, expected to hyperpolarize the  
129 somatic membrane (Fig. 2b, upper left). We then asked whether these light-evoked antidromic APs are  
130 specific to naturally-occurring chloride-channels, or a general feature of light-evoked chloride  
131 conductance in the axon. We therefore tested two engineered anion-conducting channelrhodopsins  
132 under the same experimental conditions. APs were evoked in response to 1 ms and 1 s long light pulses  
133 in 2 / 13 and 7 / 12 iC++ expressing neurons, respectively, showing that this effect is not specific to  
134 GtACRs (Fig. 2b, middle). No APs were evoked in iChloC expressing cells (n = 22 and n = 15, for 1 ms and  
135 1 s long light pulses, respectively; Fig. 2b right), likely because of the overall smaller photocurrents we  
136 observed in cells expressing this construct (Fig. 1b). To further test the hypothesis that ACR activation  
137 might be depolarizing in some neuronal compartments, we applied spatially-restricted laser pulses to  
138 the soma or neurites of cultured hippocampal neurons during whole-cell patch-clamp recordings. Light  
139 pulses directed at the soma using a galvanometric mirror system (see Online Methods) induced small  
140 hyperpolarizing or depolarizing photocurrents, while light pulses directed to neurites of the same cell  
141 evoked antidromic spikes (Fig. 2c).

142 These recordings were performed in cultured neurons after at least 14 days *in vitro*, a stage at which  
143 intracellular chloride concentrations should reach the adult state<sup>25</sup> as the expression of the neuronal  
144 potassium chloride co-transporter KCC2<sup>26</sup> is fully up-regulated<sup>27</sup>. Nevertheless, chloride homeostasis of

145 neuronal cultures may differ due to reduced concentrations of KCC2 regulators such as insulin<sup>28</sup> in the  
146 culture medium. We therefore tested whether activation of GtACR2 could lead to axonal excitation *in*  
147 *vivo*. We recorded from GtACR2-expressing mice (Fig. 1d) using movable fiberoptic-coupled microwire  
148 drives at the site of AAV injection (Fig. 1d-h). In the same animals, we implanted a second optical fiber  
149 terminating at the nucleus accumbens (NAc), a prominent projection target of the mPFC<sup>29</sup> (Fig. 2d). In  
150 response to brief light pulses to the mPFC (5 ms pulse width, 460 nm at 1 mW mm<sup>-2</sup>, which corresponds  
151 to 28.8 mW at the fiber tip), APs were evoked (Fig. 2e,g) in the same AAV-expressing region that showed  
152 significant silencing during 5 s light pulses (Fig. 1d-h). Moreover, similar 5 ms light pulses delivered to  
153 the NAc led to the induction of short-latency APs in the mPFC (Fig. 2f-g), presumably due to axonal  
154 excitation and antidromic propagation.

155 In summary, light stimulation of GtACR2-expressing axons led to APs in hippocampal neurons *in vitro*, in  
156 thalamocortical projection neurons in acute brain slices<sup>13</sup> and in striatum-projecting cortical neurons in  
157 awake, behaving mice. We therefore concluded that chloride-mediated axonal depolarization is a  
158 general phenomenon that could confound the analysis of optogenetic silencing experiments.

### 159 **Overexpression of KCC2 reduces GtACR2-mediated antidromic action potentials**

160 Based on these findings, we reasoned that if GtACR-mediated antidromic spiking is indeed due to a  
161 positively shifted chloride reversal potential in the axon, decreasing the axonal chloride concentration  
162 should reduce the probability of antidromic spike generation. The chloride extruder KCC2<sup>26</sup> is up-  
163 regulated in neurons during development, leading to high endogenous KCC2 protein levels in somatic  
164 and dendritic membranes<sup>30</sup>, but does not localize to axons<sup>31,32,33</sup>. We first tested whether  
165 overexpression of KCC2 leads to its localization to the axonal compartment in cultured hippocampal  
166 neurons. We co-transfected neurons with expression vectors encoding the green fluorescent protein  
167 mNeonGreen (GFP) and KCC2, or with GFP alone as control. We then labeled the neurons with  
168 antibodies against the dendrite-specific microtubule-associated protein-2 (MAP2) and KCC2.  
169 Overexpression of KCC2 led to strong KCC2 immunoreactivity in dendrites and somata of transfected  
170 neurons (Fig. 3a), compared to endogenous expression levels (Fig. 3a, white arrow). To quantify axonal  
171 KCC2 levels, axons were detected as neurites that are GFP-positive and MAP2-negative (Fig. 3a, zoom  
172 in). While mean axonal KCC2 intensity was not significantly different between young (7 days *in vitro*) and  
173 mature (16 days *in vitro*) hippocampal cultures, KCC2 overexpression led to a  $6.6 \pm 1.1$  fold higher axonal  
174 KCC2 signal (Fig. 3b, ctrl young vs. ctrl mature:  $P = 0.20$ ; ctrl young vs. KCC2:  $P = 5 \times 10^{-7}$ ; ctrl mature vs.  
175 KCC2:  $P = 9.8 \times 10^{-3}$ ). KCC2 expression did not significantly shift the chloride reversal potential measured

176 in the soma (Fig. 3c) or the action potential initiation threshold (rheobase, Fig. 3d), but indeed led to a  
177 significant reduction of GtACR2-evoked antidromic spiking (1 ms light pulses width, 470 nm at 4.5 mW  
178  $\text{mm}^{-2}$ ; Fig. 3e). This result provides further support for the notion that the chloride reversal potential in  
179 the axon is depolarizing under physiological conditions.

180

### 181 **Soma-targeting of GtACR2 increases somatic photocurrents and reduces axonal excitation**

182 To overcome the two main caveats of GtACRs in respect to their utility as optogenetic inhibitory tools,  
183 namely their poor membrane targeting and triggering of antidromic spikes in the axonal compartment,  
184 we designed several new GtACR2 variants with altered membrane targeting sequences (Fig. 4a).  
185 Addition of the ER export and trafficking signals from the mammalian inward rectifying potassium-  
186 channel Kir2.1 was previously shown to reduce intracellular aggregation of the chloride-pump NpHR<sup>34,35</sup>.  
187 Indeed, fusion of these sequences to GtACR2 (eGtACR2) led to reduced intracellular accumulation *in vivo*  
188 (Fig. 4c, 2<sup>nd</sup> column). To reduce antidromic spike generation, GtACR2 should be removed from the  
189 axonal compartment. To achieve soma-specific localization of GtACR2, we replaced the ER export signal  
190 with the soma-targeting motif of the soma and proximal dendrite localized voltage-gated potassium-  
191 channel Kv2.1<sup>36,37</sup>, which was previously shown to enhance soma-localized expression of  
192 channelrhodopsin-2<sup>38,22</sup>. Hypothesizing that destabilizing the protein by adding a protein degradation-  
193 promoting proline (P), glutamic acid (E), serine (S), and threonine (T) rich sequence (PEST<sup>39</sup>) could limit  
194 the effective lifetime of membrane-resident channels diffusing along the axon, thereby potentially  
195 further restricting GtACR2 protein levels outside the somatic compartment. To test these new viral  
196 constructs, we infused AAVs encoding them unilaterally into the mPFC of mice, leading to strong  
197 fluorescence at the injection site as well as sparse labeling along the injection needle track (Fig. 4b).  
198 Soma-targeted GtACR2 (stGtACR2; Fig. 4c, 3<sup>rd</sup> column) as well as the destabilized stGtACR2-PEST (Fig. 4c  
199 ,4<sup>th</sup> column) showed improved membrane targeting, strong soma-associated fluorescence and reduced  
200 neurite fluorescence (Fig. 4d). Functional characterization of the soma-targeted constructs by whole-cell  
201 patch-clamp recordings in the acute brain slice showed a 2.6-fold increase in stationary photocurrents  
202 compared to untargeted GtACR2, leading to average photocurrents of more than 2 nA when cells were  
203 clamped to -35 mV (Fig. 4e). Improved membrane targeting alone strongly increased the antidromic  
204 spike generation probability (Fig. 5a; eGtACR2), while soma-targeting not only increased photocurrents  
205 (Fig. 4e) but also decreased the probability of inducing antidromic spikes in cultured hippocampal  
206 neurons (Fig. 5a). Destabilizing stGtACR2 using the PEST sequence led to a less pronounced reduction in

207 antidromic spike generation compared to stGtACR2 (Fig. 5a). Photocurrents were quantified in the same  
208 neurons to verify that the reduced probability of antidromic spike generation is not due to differences in  
209 peak photocurrents of the different constructs in cultured neurons (Fig. 5b). In contrast to the stationary  
210 photocurrents in acute brain slice experiments (Fig. 4e) peak photocurrents in cultured neurons did not  
211 differ significantly between constructs, pointing to a lower membrane targeting efficiency in cultured  
212 neurons or an influence of the shorter virus incubation time. Nevertheless, it follows that the dramatic  
213 reduction in antidromic spiking for stGtACR2 is not due to lower photocurrents.

214 We next asked whether stGtACR2 and stGtACR2-PEST would show improved performance through  
215 reduced light-evoked synaptic release from long-range projecting axons. We injected AAVs encoding the  
216 GtACR2 variants together with a second AAV encoding a cell-filling fluorophore unilaterally to the mPFC,  
217 to allow for visualization of the axons of cortico-cortical projection neurons in the contralateral  
218 hemisphere (Fig. 5c). During acute brain slice preparation from these mice, the corpus callosum was  
219 severed, separating the somata of the transduced cortico-cortical projecting neurons from their axon  
220 terminals in the contralateral mPFC. Conducting whole-cell patch-clamp recordings from postsynaptic  
221 neurons in areas with fluorescently-labeled axons contralateral to the injection site therefore allowed us  
222 to characterize the isolated effect of GtACR2 activation on the axonal compartment. Blue light pulses led  
223 to reliably evoked EPSCs in slices expressing the non-targeted GtACR2 (Fig. 5d). In contrast, the EPSC  
224 amplitude was dramatically reduced in slices expressing the soma-restricted stGtACR2 (Fig. 5d,e;  $473.4 \pm$   
225  $153.4$  pA vs.  $34.1 \pm 9.5$  pA for GtACR2 and stGtACR2, respectively). The increased somatic photocurrents  
226 of stGtACR2, together with the near-elimination of antidromic spiking and neurotransmitter release,  
227 make it a highly efficient tool for optogenetic inhibition.

### 228 **stGtACR2 mediated BLA inhibition prevents fear extinction learning**

229 To verify the utility of stGtACR2-mediated optogenetic inhibition in awake, behaving animals, we chose  
230 to use this tool for suppressing basolateral-amygdala (BLA) activity during extinction of auditory-cued  
231 fear conditioning, a well-established form of associative learning<sup>40</sup>. The BLA plays a central role in the  
232 acquisition as well as extinction of the conditioned freezing response. Based on previous work<sup>41</sup>, we  
233 hypothesized that temporally-precise inhibition of the BLA during the delivery of conditioned stimuli in  
234 extinction training would suppress the formation of extinction memory. We bilaterally injected mice  
235 with AAV encoding stGtACR2 or a fluorophore-only control vector into the BLA and implanted 200  $\mu$ m-  
236 diameter optical fibers above the injection sites (Fig. 6a; Supplementary Fig. 2). Following 3 weeks of  
237 recovery, mice underwent fear conditioning in context A (Fig. 6b). Both groups (stGtACR2, n = 8; control,



238 n = 8) showed increased freezing during acquisition (ctrl: from  $3.8 \pm 1.9\%$  to  $39.5 \pm 8.1\%$ ; stGtACR2: from  
239  $3.5 \pm 1.5\%$  to  $29.6 \pm 3.5\%$ , Scheirer Ray Hare test  $H = 52.91$ ,  $P = 3.5 * 10^{-10}$ ) with no significant difference  
240 between groups (ctrl vs. stGtACR2: Scheirer Ray Hare test  $H = 0.11$ ,  $P = 0.74$ ), suggesting that BLA  
241 activity is not altered merely by expression of stGtACR2 (Fig. 6c). To test for fear recall and extinction,  
242 mice underwent extinction training two days later in a different context from that in which they were  
243 fear conditioned (context B). The extinction protocol consisted of twenty 30 s tone presentations that  
244 were paired with blue light delivery (447 nm; 5 mW from each fiber tip). Mice were then tested in an  
245 extinction retrieval test the following day in which they were subjected to twenty CS presentations, but  
246 no light was delivered (Fig. 6b, right). During this test, stGtACR2 mice showed higher freezing rates  
247 during CS presentation (ctrl vs. stGtACR2: Scheirer Ray Hare test  $H = 4.30$ ,  $P = 3.8 * 10^{-2}$ ), but freezing  
248 levels were indistinguishable from control mice during the inter-tone intervals (ctrl vs. stGtACR2:  
249 Scheirer Ray Hare test  $H = 3.6 * 10^{-2}$ ,  $P = 0.85$ ), indicating that fear extinction was prevented by stGtACR2  
250 mediated BLA inhibition during CS presentation. Sierra-Mercado and colleagues<sup>41</sup>, previously showed  
251 that inhibition of the BLA by muscimol injection prior to fear extinction interfered with extinction  
252 learning. Our results extend these findings, demonstrating that temporally-precise inhibition of BLA  
253 activity only during CS presentation using stGtACR2 can interfere with extinction learning. In summary,  
254 our experiments indicate that stGtACR2 is a powerful inhibitory optogenetic tool, allowing temporally  
255 precise silencing of neuronal populations *in vivo*.

## 256 Discussion

257 We took a membrane targeting approach to allow the utilization of the high-conductance *Guillardia*  
258 *theta* anion-conducting channelrhodopsins<sup>16</sup> as an optogenetic tool in mammalian neurons. While these  
259 naturally-occurring channelrhodopsins showed great promise due to their highly efficient photocurrents  
260 and light sensitivity<sup>16</sup>, and have proven effective in silencing drosophila and zebrafish neurons<sup>19,20,21</sup>,  
261 they have seen little use in mammalian neuroscience applications. This was mainly due to poor  
262 membrane targeting and to complex effects on axonal excitability<sup>13,24</sup>. Our findings indicated that even  
263 in its non-targeted form, GtACR2 can efficiently silence neurons in the medial prefrontal cortex of  
264 behaving mice. These results were consistent with the high photocurrent amplitudes recorded in  
265 neurons expressing GtACR2, compared with cells expressing the engineered ACRs iC++ and iChloC<sup>17,15</sup>.  
266 Given the high single channel conductance, favorable photon-ion stoichiometry, and high light  
267 sensitivity, the light power density for neuronal inhibition with GtACR2 is at least one order of  
268 magnitude lower than that of other silencing opsins<sup>8,42</sup>. However, despite its apparent high efficacy, a

269 significant portion of the protein seemed to reside in intracellular compartments, where it cannot  
270 contribute to functional photocurrents. Furthermore, activation of GtACR2 in our recordings was also  
271 associated with antidromic spiking at light onset when illuminating both the proximal and distal axons.  
272 We have previously observed GtACR2-mediated triggering of synaptic release in thalamocortical axons  
273 <sup>13</sup>, consistent with recent reports of antidromic spiking in layer 2/3 pyramidal neurons <sup>24</sup> in the slice  
274 preparation. In this study, we observed GtACR2-mediated antidromic spiking in cultured hippocampal  
275 neurons, in cortico-cortical neurons in the acute slice and in cortico-striatal axons of behaving mice. Our  
276 findings indicate that axonal excitation by a chloride conductance is a general phenomenon, and could  
277 reflect a depolarized reversal potential for chloride in the axonal compartment. While such effects have  
278 been previously reported, for example in hippocampal mossy fibers <sup>43,44</sup>, cerebellar <sup>45</sup> and brain-stem  
279 axons <sup>46,47</sup>, systematic evaluation of the phenomenon has been previously restricted to axons that  
280 naturally express GABA-A receptors.

281 To determine whether elevated chloride concentration in the axon could indeed lead to GtACR2-  
282 mediated axonal excitation, we co-expressed the KCC2 transporter with GtACR2 in cultured neurons.  
283 The endogenous KCC2 transporter, which is expressed in mature neurons and is known to be  
284 responsible for extruding chloride from the somatodendritic compartment <sup>48</sup>, is known to be absent  
285 from the axon <sup>31,32,33</sup>, potentially permitting a higher chloride concentration in this compartment. Our  
286 finding that overexpression of KCC2 resulted in a significant decrease in light-induced antidromic spiking  
287 indicates that ACR-mediated antidromic spiking could indeed be the result of a smaller chloride gradient  
288 in the axon, even in adult neurons. While this antidromic spiking phenotype would probably not  
289 interfere with long-term inhibition experiments (minutes and upward), it might be a confounding factor  
290 when temporally-precise (millisecond-scale) inhibition is required. Future work could combine GtACR2  
291 stimulation with red-shifted chloride indicators to directly examine changes in chloride levels in the  
292 axonal compartment during ACR-mediated chloride conductance.

293 Most importantly, our study demonstrates that the soma-targeted variants of GtACR2 show improved  
294 membrane expression in the somatodendritic compartment, and offer superior anion photocurrents for  
295 high-efficiency optogenetic silencing of neurons in the mammalian brain. Current optogenetic  
296 experiments often involve a sparsely labeled population of neurons that are distributed across a large  
297 brain tissue volume <sup>49,50</sup>. Efficient silencing of such widely-distributed neuronal populations require  
298 continuous activity of the inhibitory optogenetic tool <sup>51</sup>, placing considerable constraints related to  
299 tissue heating and photodamage <sup>52,9</sup>. Our data indicate that stGtACR2 can provide an effective means of

300 performing such challenging experiments, due to its intrinsically high conductance, which increases its  
301 effective light sensitivity in expressing neurons. With increasing distance from the fiber tip, the  
302 wavelength dependent transmittance becomes increasingly relevant. For instance, multiplying the  
303 action spectra of GtACR1 and GtACR2<sup>16</sup> with the analytically modeled light transmittance curve<sup>23</sup> for  
304 brain tissue (Supplementary Fig. 1) revealed that excitation of GtACR2 with 480 nm or of GtACR1 with  
305 510 nm would provide optimal light-mediated silencing at 500  $\mu$ m distance from the optic fiber tip. In  
306 experiments that require optogenetic manipulation of functionally- but not anatomically-segregated  
307 neuronal populations, stGtACR2 might be combined with red-shifted tools such as C1V1<sup>53</sup>, Chrimson<sup>54</sup>  
308 or ReaChR<sup>55</sup>. Red-shifted calcium sensors<sup>56,57</sup> could also be used in combination with stGtACR2 due to  
309 its minimal responsivity at wavelengths above 560 nm. Notably, both stGtACR1 and stGtACR2 are also  
310 highly advantageous for multiphoton single-cell silencing experiments<sup>58,59</sup> owing to their somatic  
311 restriction<sup>22</sup> and high-amplitude photocurrents.

312 In summary, we have demonstrated that membrane targeting and somatodendritic restriction of the  
313 naturally-occurring anion-conducting GtACR2 address two independent constraints of this  
314 channelrhodopsin, greatly improving photocurrents and minimizing axonally-generated antidromic  
315 action potentials. We were able to achieve high-efficiency neuronal silencing with the optimized  
316 stGtACR2 and demonstrated its efficacy for temporally-precise inhibition of amygdala activity during  
317 extinction learning.

## 318 **Acknowledgments**

319 We thank M. Segal (Weizmann Institute of Science) for reagents. We thank R. Zwang for help with  
320 cloning. We thank the Yizhar laboratory members for comments on the manuscript. We acknowledge  
321 support (to O.Y.) from the Human Frontier Science Program, a European Research Council starting grant  
322 (ERC-2013-StG OptoNeuromod 337637), the Adelis Foundation, the Lord Sieff of Brimpton Memorial  
323 Fund and the Candice Appleton Family Trust. O.Y. is supported by the Gertrude and Philip Nollman  
324 Career Development Chair.

## 325 **Author Contributions**

326 M.M. and O.Y. designed the study with input from I.L.; M.M. designed the constructs, performed *in vitro*  
327 electrophysiology and imaging experiments. K.CKM. performed *in vitro* neuronal recordings. L.G.  
328 performed and analyzed *in vivo* electrophysiology recordings. P.P. performed and analyzed behavioral  
329 experiments under the guidance of Y.P. and M.M.; S.O. performed histology and imaging on behavioral  
330 mice. R.L. prepared neuronal cultures and viral vectors. M.M. and O.Y. analyzed and interpreted the  
331 results and wrote the manuscript.

## 332 References

1. Wurtz, R. H., Using perturbations to identify the brain circuits underlying active vision. *Phil. Trans. R. Soc. B* **370**, 20140205 (2015).
2. Deisseroth, K., Optogenetics. *Nature methods* **8**, 26-29 (2011).
3. Han, X. & Boyden, E. S., Multiple-color optical activation, silencing, and desynchronization of neural activity, with single-spike temporal resolution. *PLoS one* **2**, e299 (2007).
4. Zhang, F. *et al.*, Multimodal fast optical interrogation of neural circuitry. *Nature* **446**, 633-639 (2007).
5. Chow, B. Y. *et al.*, High-performance genetically targetable optical neural silencing by light-driven proton pumps. *Nature* **463**, 98-102 (2010).
6. Chuong, A. S. *et al.*, Noninvasive optical inhibition with a red-shifted microbial rhodopsin. *Nature neuroscience* **17**, 1123-1129 (2014).
7. Inoue, K. *et al.*, A light-driven sodium ion pump in marine bacteria. *Nature communications* **4**, 1678 (2013).
8. Mattis, J. *et al.*, Principles for applying optogenetic tools derived from direct comparative analysis of microbial opsins. *Nature methods* **9** (2), 159-172 (2011).
9. Stujenske, J. M., Spellman, T. & Gordon, J. A., Modeling the Spatiotemporal Dynamics of Light and Heat Propagation for In Vivo Optogenetics. *Cell reports* **12** (3), 525-534 (2015).
10. Arias-Gil, G., Ohl, F. W., Takagaki, K. & Lippert, M. T., Measurement, modeling, and prediction of temperature rise due to optogenetic brain stimulation. *Neurophotonics* **3** (4), 045007 (2016).
11. Cardin, J. A. *et al.*, Targeted optogenetic stimulation and recording of neurons in vivo using cell-type-specific expression of Channelrhodopsin-2. *Nature protocols* **5**, 247-254 (2010).
12. Groma, G. I. & Dancshazy, Z., How Many M Forms are there in the Bacteriorhodopsin Photocycle? *Biophysical journal* **50** (2), 357-366 (1986).
13. Mahn, M., Prigge, M., Ron, S., Levy, R. & Yizhar, O., Biophysical constraints of optogenetic inhibition at presynaptic terminals. *Nature neuroscience* **19** (4), 554-556 (2016).
14. Raimondo, J. V., Kay, L., Ellender, T. J. & Akerman, C. J., Optogenetic silencing strategies differ in their effects on inhibitory synaptic transmission. *Nature neuroscience* **15**, 1102-1104 (2012).
15. Wietek, J. *et al.*, An improved chloride-conducting channelrhodopsin for light-induced inhibition of neuronal activity in vivo. *Scientific reports* **5**, 14807 (2015).
16. Govorunova, E. G., Sineshchekov, O. A., Janz, R., Liu, X. & Spudich, J. L., Natural light-gated anion channels: A family of microbial rhodopsins for advanced optogenetics. *Science* **349**, 647-650 (2015).

17. Berndt, A. *et al.*, Structural foundations of optogenetics: Determinants of channelrhodopsin ion selectivity. *Proceedings of the National Academy of Sciences* **113**, 822-829 (2016).
18. Sineshchekov, O. A., Govorunova, E. G., Li, H. & Spudich, J. L., Gating mechanisms of a natural anion channelrhodopsin. *Proceedings of the National Academy of Sciences* **112**, 14236-14241 (2015).
19. Mohammad, F. *et al.*, Optogenetic inhibition of behavior with anion channelrhodopsins. *Nature methods* **14** (3), 271-274 (2017).
20. Mauss, A. S., Busch, C. & Borst, A., Optogenetic Neuronal Silencing in Drosophila during Visual Processing. *Scientific Reports* **7**, 13823 (2017).
21. Mohamed, G. A. *et al.*, Optical inhibition of larval zebrafish behaviour with anion channelrhodopsins. *BMC biology* **15**, 103 (2017).
22. Baker, C. A., Elyada, Y. M., Parra, A. & Bolton, M. M., Cellular resolution circuit mapping with temporal-focused excitation of soma-targeted channelrhodopsin. *eLife* **5** (2016).
23. Yona, G., Meitav, N., Kahn, I. & Shoham, S., Realistic numerical and analytical modeling of light scattering in brain tissue for optogenetic applications. *eneuro* **3**, ENEURO--0059 (2016).
24. Malyshev, A. Y. *et al.*, Chloride conducting light activated channel GtACR2 can produce both cessation of firing and generation of action potentials in cortical neurons in response to light. *Neuroscience letters* **640**, 76-80 (2017).
25. Ganguly, K., Schinder, A. F., Wong, S. T. & Poo, M.-m., GABA itself promotes the developmental switch of neuronal GABAergic responses from excitation to inhibition. *Cell* **105**, 521-532 (2001).
26. Payne, J. A., Stevenson, T. J. & Donaldson, L. F., Molecular characterization of a putative K-Cl cotransporter in rat brain A neuronal-specific isoform. *Journal of Biological Chemistry* **271**, 16245-16252 (1996).
27. Khirug, S. *et al.*, Distinct properties of functional KCC2 expression in immature mouse hippocampal neurons in culture and in acute slices. *European Journal of Neuroscience* **21**, 899-904 (2005).
28. Kelsch, W. *et al.*, Insulin-like growth factor 1 and a cytosolic tyrosine kinase activate chloride outward transport during maturation of hippocampal neurons. *The Journal of neuroscience : the official journal of the Society for Neuroscience* **21** (21), 8339-8347 (2001).
29. Gabbott, P. L. A., Warner, T. A., Jays, P. R. L., Salway, P. & Busby, S. J., Prefrontal cortex in the rat: Projections to subcortical autonomic, motor, and limbic centers. *The Journal of Comparative Neurology* **492**, 145-177 (2005).
30. Zhu, L., Lovinger, D. & Delpire, E., Cortical neurons lacking KCC2 expression show impaired regulation of intracellular chloride. *Journal of neurophysiology* **93** (3), 1557-1568 (2005).
31. Hübner, C. A. *et al.*, Disruption of KCC2 reveals an essential role of K-Cl cotransport already in early

- synaptic inhibition. *Neuron* **30** (2), 515-524 (2001).
32. Szabadics, J. *et al.*, Excitatory effect of GABAergic axo-axonic cells in cortical microcircuits. *Science (New York, N.Y.)* **311** (5758), 233-235 (2006).
  33. Báldi, R., Varga, C. & Tamás, G., Differential distribution of KCC2 along the axo-somato-dendritic axis of hippocampal principal cells. *The European journal of neuroscience* **32** (8), 1319-1325 (2010).
  34. Gradinaru, V., Thompson, K. R. & Deisseroth, K., eNpHR: a Natronomonas halorhodopsin enhanced for optogenetic applications. *Brain cell biology* **36** (1-4), 129-139 (2008).
  35. Gradinaru, V. *et al.*, Molecular and cellular approaches for diversifying and extending optogenetics. *Cell* **141** (1), 154-165 (2010).
  36. Trimmer, J. S., Immunological identification and characterization of a delayed rectifier K<sup>+</sup> channel polypeptide in rat brain. *Proceedings of the National Academy of Sciences of the United States of America* **88** (23), 10764-10768 (1991).
  37. Lim, S. T., Antonucci, D. E., Scannevin, R. H. & Trimmer, J. S., A novel targeting signal for proximal clustering of the Kv2.1 K<sup>+</sup> channel in hippocampal neurons. *Neuron* **25** (2), 385-397 (2000).
  38. Wu, C., Ivanova, E., Zhang, Y. & Pan, Z.-H., rAAV-mediated subcellular targeting of optogenetic tools in retinal ganglion cells in vivo. *PloS one* **8** (6), e66332 (2013).
  39. Rogers, S., Wells, R. & Rechsteiner, M., Amino acid sequences common to rapidly degraded proteins: the PEST hypothesis. *Science (New York, N.Y.)* **234** (4774), 364-368 (1986).
  40. Tovote, P., Fadok, J. P. & Lüthi, A., Neuronal circuits for fear and anxiety. *Nature reviews. Neuroscience* **16** (6), 317-331 (2015).
  41. Sierra-Mercado, D., Padilla-Coreano, N. & Quirk, G. J., Dissociable roles of prelimbic and infralimbic cortices, ventral hippocampus, and basolateral amygdala in the expression and extinction of conditioned fear. *Neuropsychopharmacology : official publication of the American College of Neuropsychopharmacology* **36** (2), 529-538 (2011).
  42. Wietek, J. *et al.*, Anion-conducting channelrhodopsins with tuned spectra and modified kinetics engineered for optogenetic manipulation of behavior. *Scientific Reports* **7**, 14957 (2017).
  43. Alle, H. & Geiger, J. R. P., GABAergic spill-over transmission onto hippocampal mossy fiber boutons. *Journal of Neuroscience* **27**, 942-950 (2007).
  44. Ruiz, A., Campanac, E., Scott, R. S., Rusakov, D. A. & Kullmann, D. M., Presynaptic GABAA receptors enhance transmission and LTP induction at hippocampal mossy fiber synapses. *Nature neuroscience* **13**, 431-438 (2010).
  45. Pugh, J. R. & Jahr, C. E., Axonal GABAA receptors increase cerebellar granule cell excitability and synaptic activity. *The Journal of neuroscience : the official journal of the Society for Neuroscience* **31** (2),

- 565-574 (2011).
46. Turecek, R. & Trussell, L. O., Presynaptic glycine receptors enhance transmitter release at a mammalian central synapse. *Nature* **411** (6837), 587-590 (2001).
  47. Price, G. D. & Trussell, L. O., Estimate of the chloride concentration in a central glutamatergic terminal: a gramicidin perforated-patch study on the calyx of Held. *Journal of Neuroscience* **26**, 11432-11436 (2006).
  48. Kaila, K., Price, T. J., Payne, J. A., Puskarjov, M. & Voipio, J., Cation-chloride cotransporters in neuronal development, plasticity and disease. *Nature Reviews Neuroscience* **15**, 637-654 (2014).
  49. Liu, X. *et al.*, Optogenetic stimulation of a hippocampal engram activates fear memory recall. *Nature* (2012).
  50. Kim, C. K., Adhikari, A. & Deisseroth, K., Integration of optogenetics with complementary methodologies in systems neuroscience. *Nature Reviews Neuroscience* **18**, 222-235 (2017).
  51. Wiegert, J. S., Mahn, M., Prigge, M., Printz, Y. & Yizhar, O., Silencing neurons: tools, applications, and experimental constraints. *Neuron* **95**, 504-529 (2017).
  52. Lee, J. H. *et al.*, Global and local fMRI signals driven by neurons defined optogenetically by type and wiring. *Nature* **465** (7299), 788-792 (2010).
  53. Yizhar, O. *et al.*, Neocortical excitation/inhibition balance in information processing and social dysfunction. *Nature* **477** (7363), 171-178 (2011).
  54. Klapoetke, N. C. *et al.*, Independent optical excitation of distinct neural populations. *Nature methods* **11** (3), 338-346 (2014).
  55. Lin, J. Y., Knutsen, P. M., Muller, A., Kleinfeld, D. & Tsien, R. Y., ReaChR: a red-shifted variant of channelrhodopsin enables deep transcranial optogenetic excitation. *Nature neuroscience* **16** (10), 1499-1508 (2013).
  56. Dana, H. *et al.*, Sensitive red protein calcium indicators for imaging neural activity. *eLife* **5** (2016).
  57. Inoue, M. *et al.*, Rational design of a high-affinity, fast, red calcium indicator R-CaMP2. *Nature methods* **12** (1), 64-70 (2015).
  58. Prakash, R. *et al.*, Two-photon optogenetic toolbox for fast inhibition, excitation and bistable modulation. *Nature Methods* **9**, 1171-1179 (2012).
  59. Packer, A. M. *et al.*, Two-photon optogenetics of dendritic spines and neural circuits. *Nature Methods* **9**, 1202-1205 (2012).
  60. Liu, Y. *et al.*, OptogenSIM: a 3D Monte Carlo simulation platform for light delivery design in optogenetics. *Biomedical optics express* **6** (12), 4859-4870 (2015).

61. Chugh, B. P. *et al.*, Measurement of cerebral blood volume in mouse brain regions using micro-computed tomography. *NeuroImage* **47** (4), 1312-1318 (2009).
62. Grimm, D., Kay, M. A. & Kleinschmidt, J. A., Helper virus-free, optically controllable, and two-plasmid-based production of adeno-associated virus vectors of serotypes 1 to 6. *Molecular therapy : the journal of the American Society of Gene Therapy* **7** (6), 839-850 (2003).
63. Graham, F. L. & Eb, A. J., A new technique for the assay of infectivity of human adenovirus 5 DNA. *Virology* **52** (2), 456-467 (1973).
64. Anikeeva, P. *et al.*, Optetrode: a multichannel readout for optogenetic control in freely moving mice. *Nature neuroscience* **15** (1), 163-170 (2011).
65. Grünwald, D., Shenoy, S. M., Burke, S. & Singer, R. H., Calibrating excitation light fluxes for quantitative light microscopy in cell biology. *Nature protocols* **3** (11), 1809-1814 (2008).
66. Pugh, J. R. & Jahr, C. E., Activation of axonal receptors by GABA spillover increases somatic firing. *The Journal of neuroscience : the official journal of the Society for Neuroscience* **33** (43), 16924-16929 (2013).

333

334



335 **Figures**

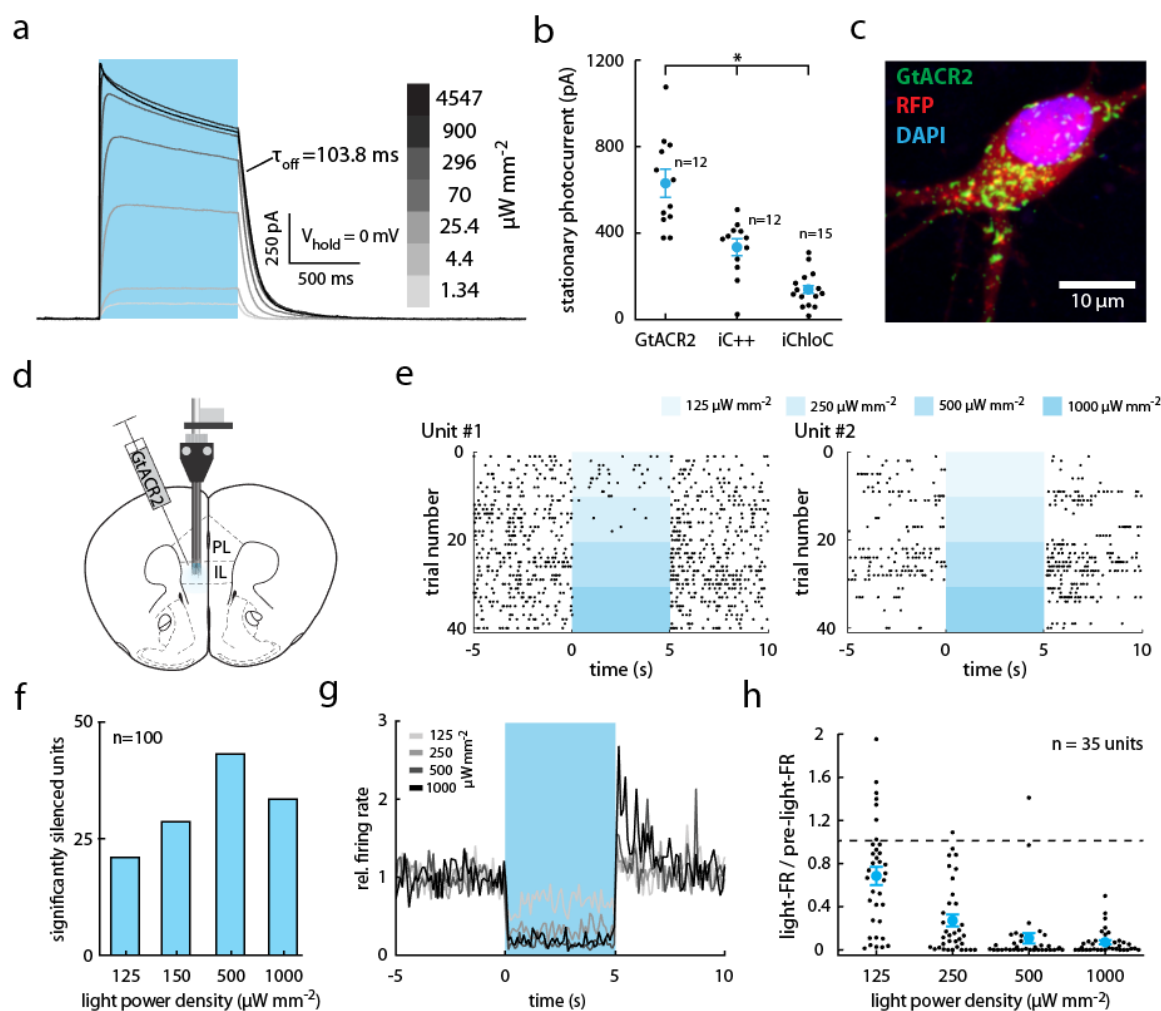

336

337 **Figure 1. GtACR2 efficiently silences neuronal activity *in vivo***

338 **(a-c)** Characterization of ACRs in cultured rat hippocampal neurons. **(a)** Sample whole-cell voltage-clamp  
 339 photocurrent recording of a GtACR2-expressing cell illuminated (470 nm) with increasing light power density. **(b)**  
 340 Comparison of stationary photocurrents of blue light-sensitive ACRs ( $V_{\text{hold}} = -35 \text{ mV}$ , current after 1 s of continuous  
 341 illumination). Neurons expressing GtACR2 ( $n = 12$ ) showed the highest photocurrents compared with neurons  
 342 expressing iC++ ( $n = 12$ ) and iChloC ( $n = 15$ ).  $F(2,36) = 36.92$ ,  $P = 1.9 \times 10^{-9}$  **(c)** Representative image of GtACR2  
 343 localization. Green: GtACR2, red: cytoplasmic RFP, blue: nucleus. **(d-h)** *In vivo* quantification of GtACR2 mediated  
 344 neuronal silencing efficiency. **(d)** Schematic of experimental paradigm. Extracellular recordings from the mPFC  
 345 were performed with a movable optrode following injection of AAV2/1 encoding GtACR2 into the mPFC. **(e)** Two  
 346 representative raster plots of units significantly reducing their firing rate during 5 s of illumination with blue light  
 347 (460 nm). Each light power was tested 10 times. While the unit depicted on the left shows a graded response to  
 348 increasing light powers, the unit depicted on the right is completely inhibited even at the lowest tested light  
 349 power. **(f)** Number of units that significantly reduced their firing rate compared to 5 s pre-light period, dependent  
 350 on the tested light powers. **(g)** Normalized firing rate (FR / pre-light-FR, 100 ms bins) of all significantly silenced  
 351 units. **(h)** Quantification of g. In b and h, results are presented as means ( $\pm$  SEM).

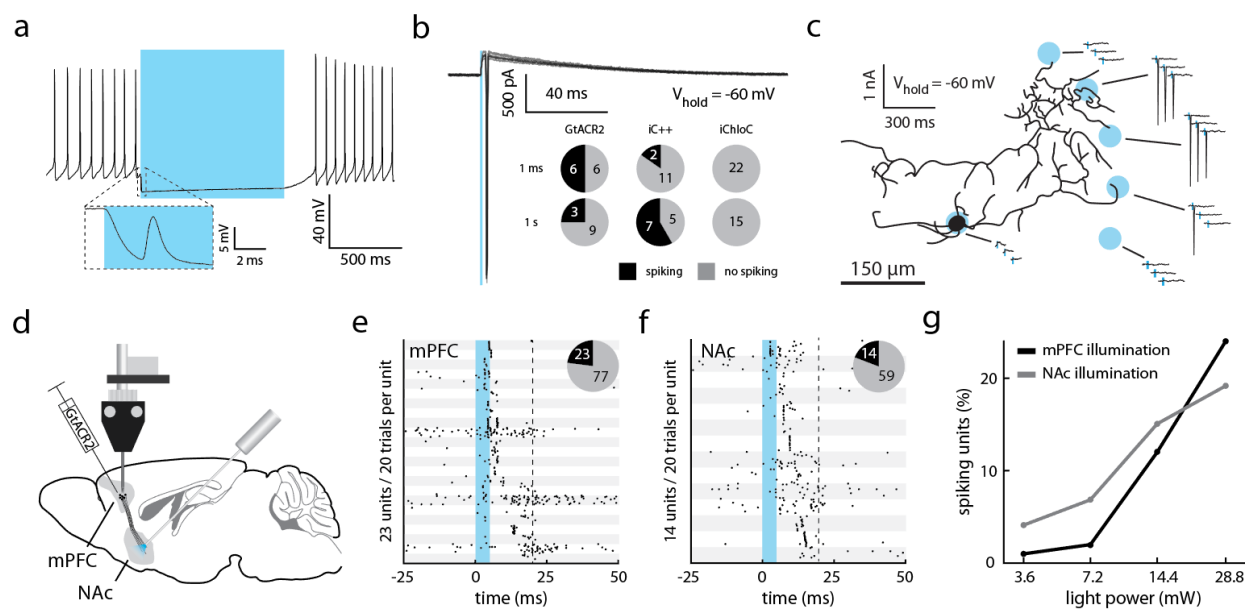

352

353 **Figure 2. Activation of GtACR2 in the axonal compartment induces action potentials *in vitro* and *in***  
 354 ***vivo***

355 **(a-b)** Characterization of light-evoked spiking in ACR-expressing cultured hippocampal neurons (470 nm at 4.5 mW  
 356 mm<sup>-2</sup>). **(a)** Representative whole-cell current-clamp recording of a GtACR2-expressing cell silenced by light  
 357 application. Inset: strongly attenuated spike occurring shortly after light onset. **(b)** Representative whole-cell  
 358 voltage-clamp recording of escaped action potentials in response to 1 ms light pulses. Pie charts depict the number  
 359 of neurons with induced spikes for the three tested light-gated chloride channels: GtACR2, iC++ and iChloC. **(c)**  
 360 illumination of distal neurites induces spiking in cultured neurons. Schematic depicting the outline of a GtACR2-  
 361 expressing neuron overlaid with the locations of laser illumination spots. Shown are whole-cell voltage-clamp  
 362 responses to spatially-restricted illumination at the indicated locations. **(d-g)** *In vivo* extracellular recording  
 363 following GtACR2 expression in the mPFC. **(d)** Schematic of the implantation allowing for illumination of the NAc, a  
 364 downstream target of the mPFC, while recording in the mPFC. **(e)** Single units recorded in the mPFC, showing rapid  
 365 light-evoked responses during a 20 ms time-window starting with a 5 ms light pulse (1 mW mm<sup>-2</sup>, corresponding to  
 366 28.8 mW at the fiber tip). Units are arranged from top to bottom according to their mean first spike latency across  
 367 20 trials. Pie charts depict the number of neurons with significantly increased spike rates. **(f)** mPFC units showing  
 368 significantly increased firing rates in response to illumination of the NAc. Units are sorted by mean spike latency.  
 369 Light power at the fiber tip: 28.8 mW. Pie chart as in (e). **(g)** Percent of units with increased firing rate in response  
 370 to 5 ms light pulses of increasing light power.

371

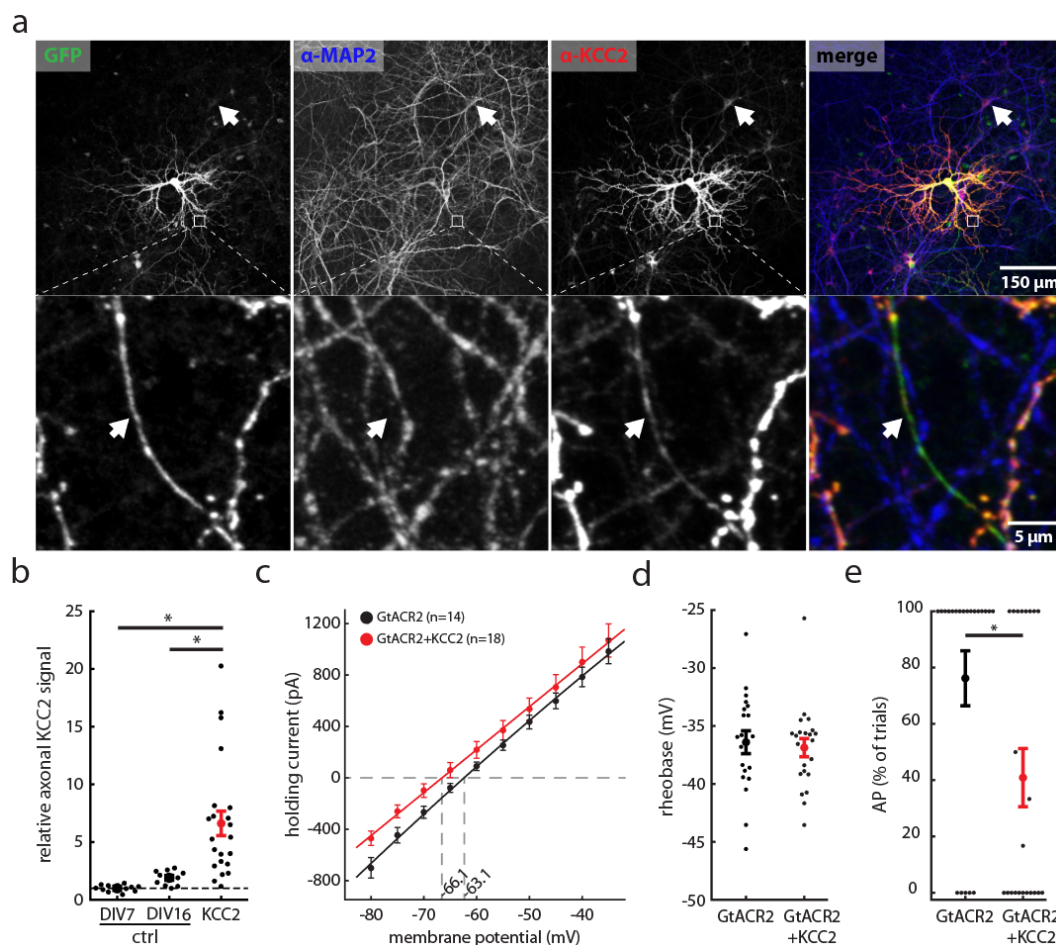

372

373 **Figure 3. Overexpression of KCC2 reduces antidromic spiking in cultured hippocampal neurons**

374 **(a)** Images from an KCC2 overexpression experiment. Endogenous KCC2 is expressed in the somatic compartment,  
 375 while overexpression of KCC2 led to increased expression in axonal projections. Cultured hippocampal neurons  
 376 were sparsely transfected either with GFP alone (ctrl) or GFP and KCC2. Neurons were then fixed and stained for  
 377 MAP2 and KCC2. Top images show a representative region of interest with one overexpressing cell in the center.  
 378 The arrow indicates a neuronal cell body expressing endogenous KCC2 levels at 16 days *in vitro* (DIV). Bottom  
 379 images depict MAP2-expressing dendrites and a single MAP2-negative axon (arrow), which is positive for  
 380 overexpressed KCC2 based on its anti-KCC2 fluorescence. **(b)** Quantification of axonal KCC2 immunofluorescence  
 381 for immature (DIV7) and mature control neurons (DIV16) and neurons overexpressing KCC2, normalized to the  
 382 average axonal KCC2 signal in immature neurons (DIV7). Axonal KCC2 fluorescence is significantly higher in KCC2  
 383 overexpressing cultures. (Kruskal–Wallis H test,  $H(2,44) = 29.26$ ,  $P < 10^{-4}$ ; ctrl:  $n_{DIV7} = 11$ ,  $n_{DIV16} = 10$ , KCC2:  $n = 23$ )  
 384 **(c-e)** Physiological properties and light-evoked spiking in cultured hippocampal neurons expressing either only  
 385 GtACR2, or co-expressing KCC2. **(c)** Effect of KCC2 overexpression on the IV-curve. The reversal potential did not  
 386 differ significantly (Students t-test = 1.5, GtACR2:  $n = 14$ , GtACR2+KCC2:  $n = 18$ ,  $P = 0.15$  two-tailed). **(d)**  
 387 Comparison of the minimal current injection to induce an action potential (rheobase). KCC2 overexpressing  
 388 neurons did not differ from GtACR2 only expressing neurons (Students t-test = 0.5, GtACR2:  $n = 21$ , GtACR2+KCC2:  
 389  $n = 22$ ,  $P = 0.7$  two-tailed). **(e)** KCC2 overexpression significantly reduced the likelihood of GtACR2 mediated action  
 390 potential generation. (Mann–Whitney U = 146.5,  $n_{GtACR2} = 21$ ,  $n_{GtACR2+KCC2} = 22$ ,  $P = 4 * 10^{-2}$ ). All results are  
 391 presented as means ( $\pm$  SEM).

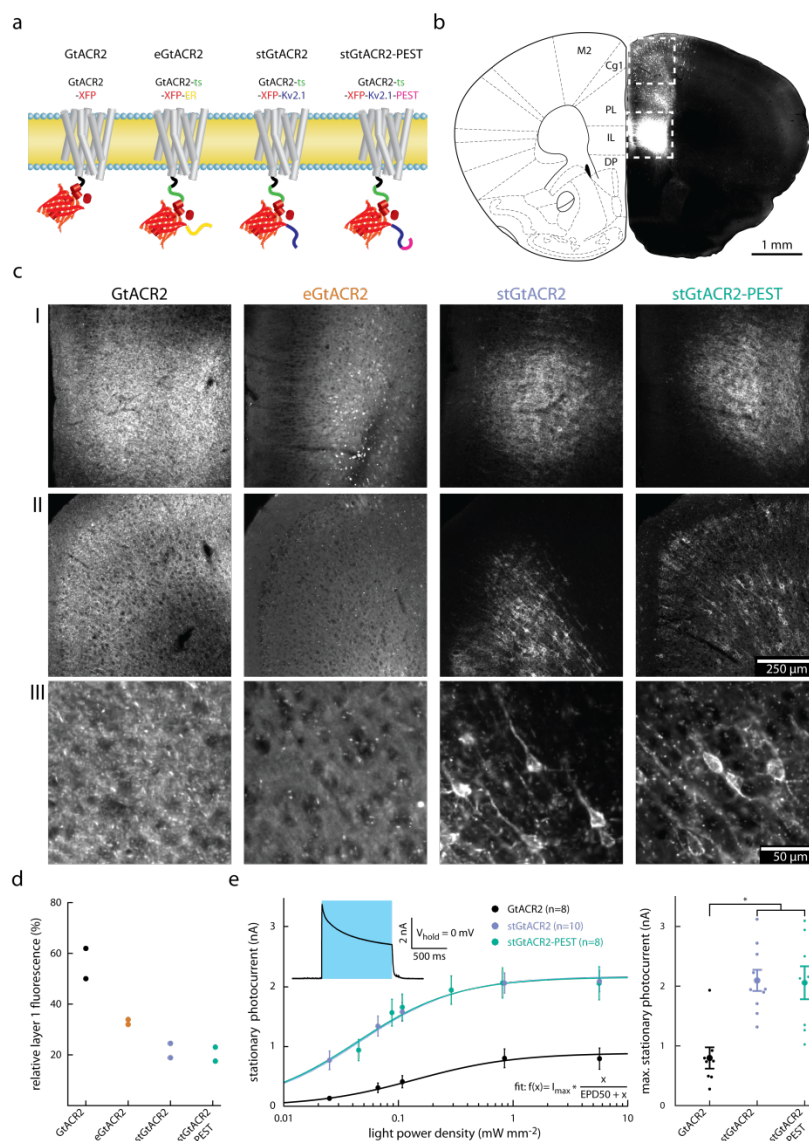

392

393 **Figure 4. Targeting GtACR2 to the neuronal soma leads to enhanced photocurrent amplitude**

394 **(a)** Schematic of different targeting approaches. **(b)** Image showing the fluorescence resulting from AAV2/1  
 395 mediated cytosolic fluorophore expression in the mPFC. Transduction is most dense at the injection site (indicated  
 396 by the lower dashed box) and sparse along the injection needle track (upper dashed box). **(c)** Higher magnification  
 397 images of the areas indicated in b. c-I: Zoom in on the injection site. c-II: Zoom in on the more dorsal region of  
 398 sparse expression. c-III: Higher magnification of c-II. stGtACR2 and stGtACR2-PEST show enrichment at the soma.  
 399 **(d)** Quantification of soma restriction by normalizing mPFC layer 1 fluorescence by the mean fluorescence  
 400 measured at the injection center. Targeting reduces relative layer 1 fluorescence ( $n = 2$  per group). **(e)** Light power  
 401 density dependence of stationary photocurrent in whole-cell patch-clamp recordings of neurons in acute brain  
 402 slices. Inset: Representative whole-cell voltage-clamp recording. The stationary photocurrent was defined as the  
 403 photocurrent at the end of a 1 s light pulse. The fit was performed per cell with the effective light power density  
 404 for 50% photocurrent (EPD50) as free parameter. stGtACR2 and stGtACR2-PEST have a significantly higher maximal  
 405 stationary photocurrent than GtACR2 ( $F(2,23) = 11.84$ ,  $P = 2.9 \times 10^{-4}$ ; GtACR2:  $n = 8$ , stGtACR2:  $n = 10$ , stGtACR2-  
 406 PEST:  $n = 8$ ). Results are presented as means ( $\pm$  SEM).

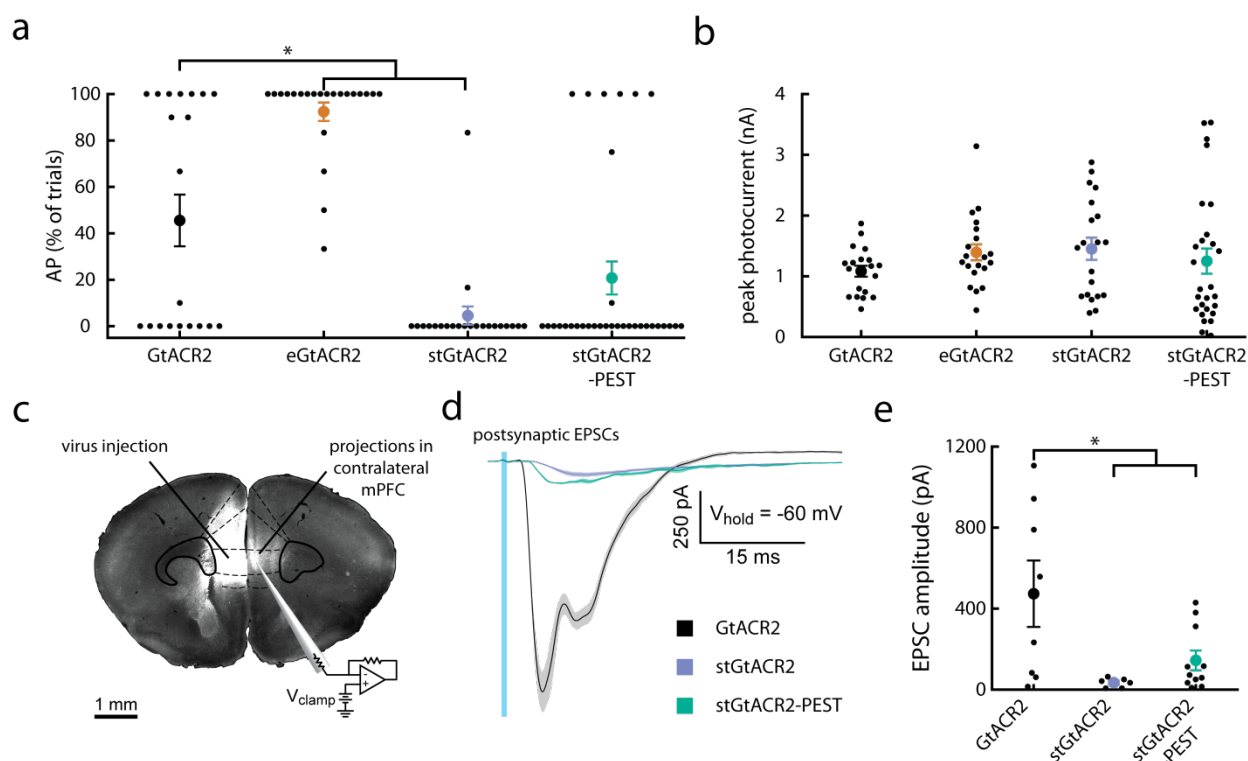

407

408 **Figure 5. Targeting GtACR2 to the somatodendritic compartment attenuates axonal excitation**

409 **(a)** Comparison of the incidence of antidromic spikes triggered by 1 ms light pulses in virally transduced cultured  
 410 hippocampal neurons. eGtACR2 has a significantly increased AP incidence, while stGtACR2 decreases the  
 411 occurrence of APs. (Kruskal–Wallis H test,  $H(3,97) = 47$ ,  $P < 10^{-4}$ ; n GtACR2 = 20, n eGtACR2 = 22, n stGtACR2 = 22, n  
 412 stGtACR2-PEST = 33) **(b)** Peak photocurrents did not differ significantly between the constructs, showing that  
 413 reduced AP incidence in stGtACR2 transduced neurons does not stem from smaller photocurrents. ( $F(3,82) = 0.83$ ,  
 414  $P = 0.48$ ). **(c)** Schematic of the experimental setup to characterize GtACR2 triggered axonal neurotransmitter  
 415 release in acute brain slices. Virus encoding a cytosolic fluorophore was co-injected with the GtACR2 variants to  
 416 allow for visualization of the axon terminals of transduced cortico-cortical projection neurons. Contralateral  
 417 neurons in areas with high fluorescence intensity were recorded. **(d)** Representative traces of excitatory post-  
 418 synaptic currents in response to 1 ms light pulses (470 nm, at  $4.5 \text{ mW mm}^{-2}$ ). **(e)** Quantification of the light evoked  
 419 post-synaptic current amplitude. Soma targeting led to significant reduction in light evoked EPSCs amplitudes  
 420 ( $F(2,22) = 5.54$ ,  $P = 1.13 \times 10^{-2}$ ). All results are presented as means ( $\pm$  SEM).

421

422

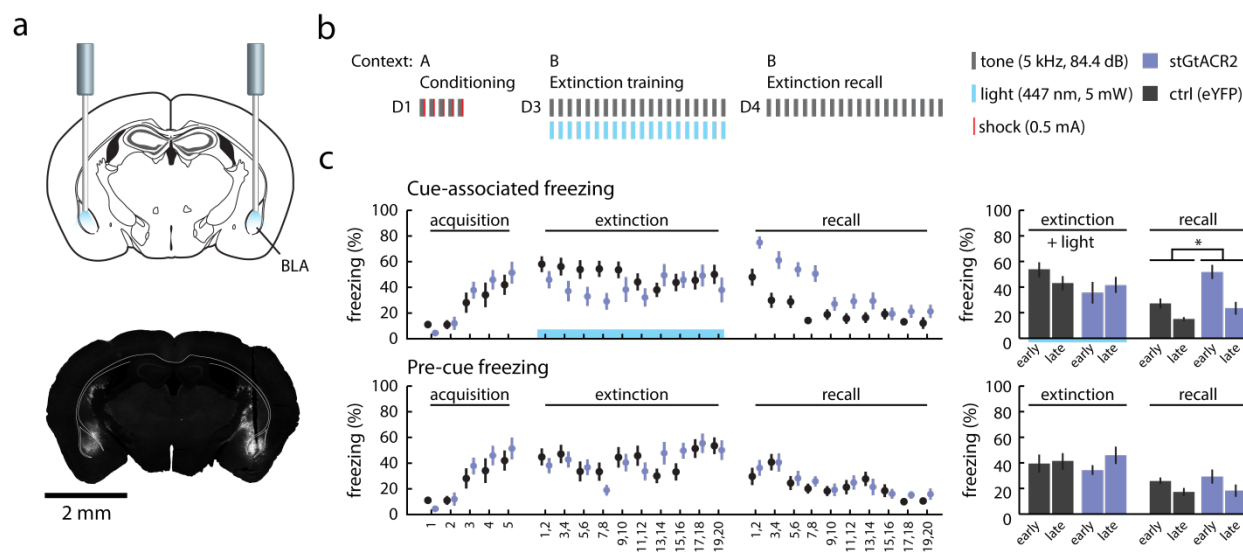

423

424

**Figure 6. Silencing of cue-associated BLA activity using stGtACR2 suppresses extinction of cued**

425

**freezing.**

426

(a) Mice were bilaterally injected with eYFP or stGtACR2-encoding virus and implanted with optic fibers targeting

427

the BLA. Bottom: representative image of stGtACR2 expression in the BLA. (b) stGtACR2 and control (eYFP) mice

428

were subjected to auditory fear conditioning (day 1, conditioning), extinction training (day 3, early and late

429

extinction) and extinction recall (day 4, early and late recall). During auditory fear conditioning mice were

430

submitted to five tone (CS)-shock (US) presentations in context A. On day 3 twenty 30 s tone (CS) presentations

431

were paired with light (447 nm at 5 mW exiting the fiber tip) in context B. On day 4 extinction recall was tested by

432

twenty 30 s tone presentations in context B. (c) Percentage of freezing during presentation of the CS (top row) and

433

the 30 s prior to CS (bottom row). The right column depicts the mean percentage of freezing during the early and

434

late phases of the trials for the two groups. Mean freezing levels for ctrl and stGtACR2 mice, during the early recall

435

phase, were  $28 \pm 4\%$  and  $54 \pm 6\%$ , respectively; the distributions in the two groups differed significantly (Scheirer

436

Ray Hare test  $H = 4.30$ ,  $P = 3.8 \times 10^{-2}$ ). All results are presented as means ( $\pm$  SEM).

437

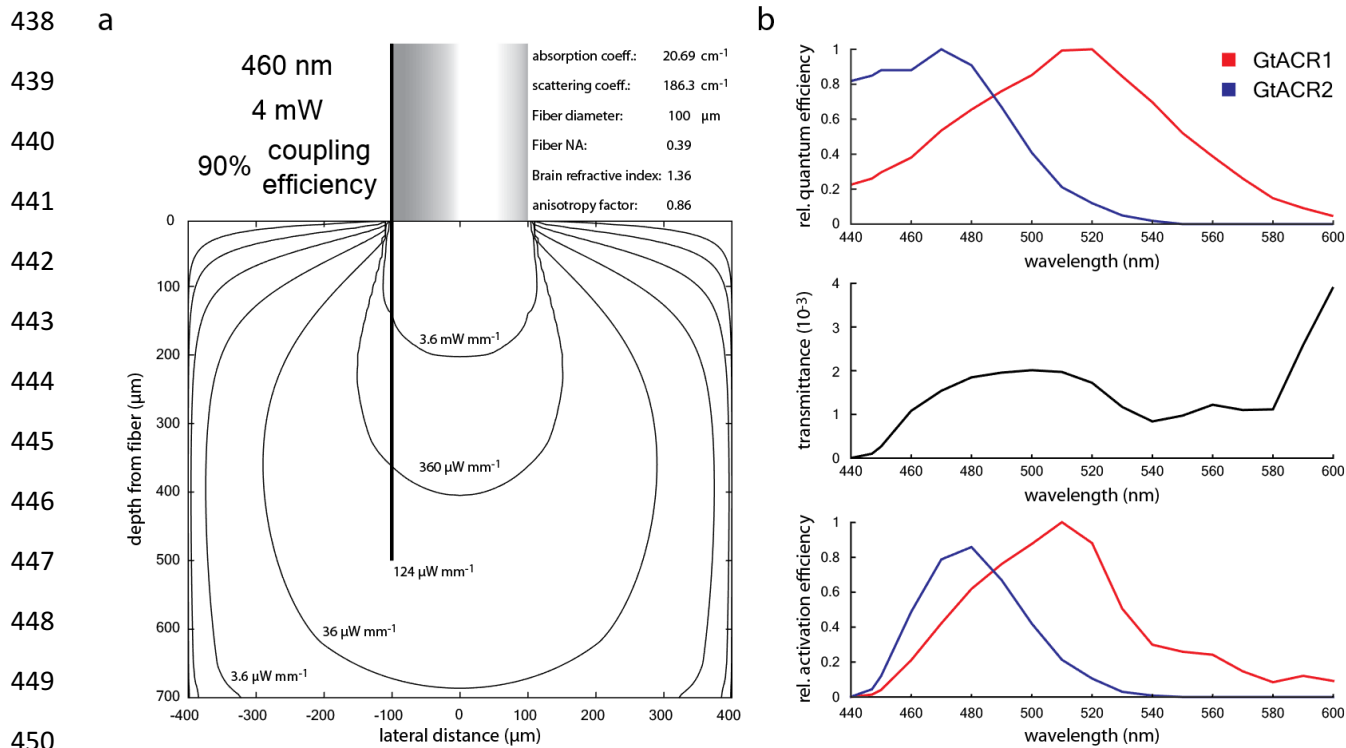

451 **Supplementary figure 1. Functional action spectra of GtACR1 and GtACR2 based on multiplication with**

452 **analytical light spread estimation**

453 Light propagation from a flat-cleaved optical fiber within brain tissue was estimated by analytical modeling<sup>23</sup>, using

454 gray matter parameters as estimated by Liu et al.<sup>60</sup>: Wavelength dependent brain scattering coefficient:  $\mu_s(\lambda) =$

455  $(2.37 * (\lambda / 500 \text{ nm}) - 1.15) / (1 - g)$ . Absorption is estimated as:  $\mu_a(\lambda) = B * S * \mu_a(\text{HbO}_2(\lambda)) + B * (1 - S) * \mu_a(\text{Hb}(\lambda)) +$

456  $W * \mu_a(\text{H}_2\text{O}(\lambda))$ . Blood oxygen saturation: S (62%). Estimated percentage of water in brain tissue: W (65%).

457 Percentage of blood in the brain tissue (B). Cerebral cortex (PFC) blood volume excluding major vessels was

458 estimated as 4.6 % according to Chugh et al. (2009)<sup>61</sup>. Wavelength dependent blood and water absorption

459 coefficients from omicron.org were used. (a) Contour lines of estimated light power densities resulting from 4 mW

460 light coupled to an optical fiber. At the recording site (500 μm below and 100 μm lateral to the optical fiber center)

461 the light power density drops to ~0.11 % of the light power density at the fiber surface. (b) Comparison of GtACR1

462 and GtACR2 activation efficiency within brain tissue by including the wavelength dependent transmittance. Top:

463 relative quantum efficiency as reported in Govorunova et al. (2015)<sup>16</sup>. Middle: Wavelength dependent

464 transmittance at electrode recording site, modeled as in a. Bottom: Relative activation efficiency normalized by

465 maximal activation of GtACR1. The higher scattering and absorption at 470 nm shift the most efficient excitation

466 wavelength to 480 nm for GtACR2. The higher blood absorption coefficient at 520 nm results in 510 nm being the

467 most efficient wavelength for GtACR1 activation at this distance from the optic fiber. According to this estimation

468 GtACR1 used at 510 nm allows for 14% lower light powers compared to GtACR2 excited at 480 nm, making GtACR1

469 the more efficient tool when only a single wavelength is needed. However, GtACR1 will cause non-permissive

470 activation in the lower as well as the higher wavelength ranges, therefore only GtACR2 allows for the combination

471 with other currently available optogenetic actuators or reporters.

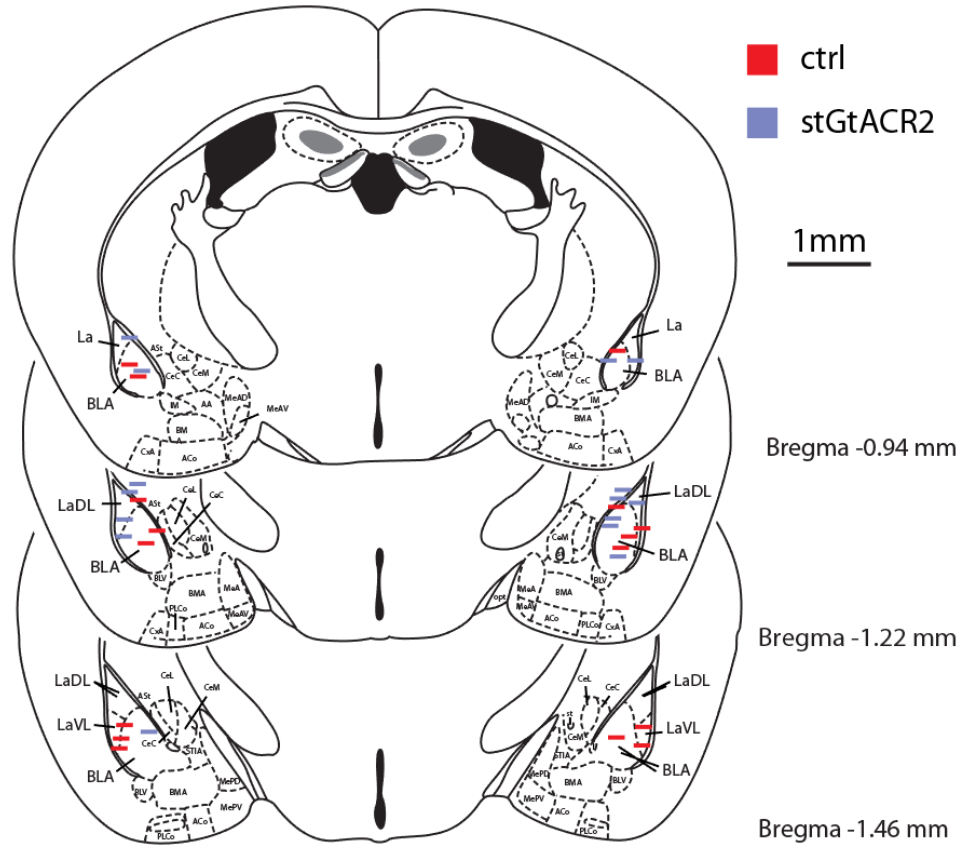

473

474 **Supplementary figure 2. Summary of optical fiber placement of BLA silencing**

475 In fixed brain sections obtained from fear extinction learning experiment animals, fiber placement was  
476 determined, and stGtACR2 expression in the BLA close to the fiber was verified. Horizontal lines mark the  
477 approximate fiber face position.

478



## 479 **Experimental Procedures**

### 480 **Production of recombinant AAV vectors**

481 HEK293 cells were seeded at 25%-35% confluence. The cells were transfected 24 h later with plasmids  
482 encoding AAV rep, cap and a vector plasmid for the rAAV cassette expressing the relevant DNA using the  
483 PEI method<sup>62</sup>. Cells and medium were harvested 72 h after transfection, pelleted by centrifugation (300  
484 g), resuspended in lysis solution ([mM]: 150 NaCl, 50 Tris-HCl; pH 8.5 with NaOH) and lysed by three  
485 freeze-thaw cycles. The crude lysate was treated with 250 U benzonase (Sigma) per 1 ml of lysate at  
486 37°C for 1.5 h to degrade genomic and unpackaged AAV DNA before centrifugation at 3000 g for 15 min  
487 to pellet cell debris. The virus particles in the supernatant (crude virus) were purified using heparin-  
488 agarose columns, eluted with soluble heparin, washed with phosphate buffered saline (PBS) and  
489 concentrated by Amicon columns. Viral suspension was aliquoted and stored at -80°C. Viral titers were  
490 measured using real-time PCR. AAV vectors used for intracranial injections had genomic titers ranging  
491 between  $8.6 \times 10^{10}$  and  $2 \times 10^{11}$  genome copies per milliliter (gc/ml). Where directly compared virus titers  
492 were matched by dilution to the lowest concentration. AAV vectors used for neuronal culture  
493 transduction were added 4 days after cell seeding. The titer was matched to final medium concentration  
494 of  $1.1 \times 10^8$  gc/ml. All of the AAV expression constructs described in this study will be available freely on  
495 Addgene to facilitate the utilization of these new tools by the neuroscience community.

496 The following viruses were used in this study:

497 AAV2/1.hSyn1.GtACR2-eGFP.WPRE, AAV2/1.CamKII $\alpha$ .GtACR2-ts-Fred-Kv2.1.WPRE,  
498 AAV2/1.CamKII $\alpha$ .GtACR2-ts-Fred-ER.WPRE, AAV2/1.CamKII $\alpha$ .GtACR2-ts-Fred-Kv2.1-PEST.WPRE,  
499 AAV2/1.CamKII $\alpha$ .TagRFP-T.WPRE, AAV2/1.CamKII $\alpha$ .eYFP.WPRE, AAV2/1.CamKII $\alpha$ .iC++-eYFP.WPRE,  
500 AAV2/1.hSyn.iChIOC-eGFP.WPRE.

### 501 **Primary hippocampal neuron culture**

502 Primary cultured hippocampal neurons were prepared from male and female P0 Sprague-Dawley rat  
503 pups (Envigo). CA1 and CA3 were isolated, digested with  $0.4 \text{ mg ml}^{-1}$  papain (Worthington), and plated  
504 onto glass coverslips pre-coated with 1:30 Matrigel (Corning). Cultured neurons were maintained in a  
505 5% CO<sub>2</sub> humidified incubator with Neurobasal-A medium (Invitrogen) containing 1.25% fetal bovine  
506 serum (FBS, Biological Industries), 4% B-27 supplement (Gibco), 2 mM Glutamax (Gibco) and plated on  
507 coverslips in a 24-well plate at a density of 65,000 cells per well. To inhibit glial overgrowth, 200  $\mu\text{M}$   
508 fluorodeoxyuridine (FUDR, Sigma) was added after 4 days of *in vitro* culture (DIV).

## 509 **Calcium phosphate transfection of cultured neurons**

510 Neurons were transfected using the calcium phosphate method<sup>63</sup>. Briefly, the medium of primary  
511 hippocampal neurons cultured in a 24 well plate was collected and replaced with 400  $\mu$ l serum-free  
512 MEM medium (ThermoFisher scientific). 30  $\mu$ l transfection mix (2  $\mu$ g plasmid DNA and 250  $\mu$ M  $\text{CaCl}_2$  in  
513 HBS at pH 7.05) were added per well. After 1 h incubation the cells were washed 2 times with MEM and  
514 the medium was changed back to the collected original medium. Cultured neurons were used between  
515 14 – 17 DIV for experiments.

516 The following plasmids were used in this study:

517 pAAV\_hSyn1\_GtACR2-eGFP\_WPRE (based on Addgene 85463), pAAV\_CamKII $\alpha$ \_mNeonGreen\_WPRE,  
518 pAAV\_CamKII $\alpha$ (0.4kb)\_mScarlet\_WPRE, pCITF\_KCC2-tdTomato (Addgene 61404).

## 519 **Animals**

520 All experimental procedures were approved by the Institutional Animal Care and Use Committee  
521 (IACUC) at the Weizmann Institute of Science. Six-week-old C57BL/6 mice (P35–45) were obtained from  
522 Envigo. Up to 5 male or female C57BL/6 mice were housed in a cage in a light-dark (12 h-12 h) cycle with  
523 food and water ad libitum. Mice were housed for 6-12 weeks following surgery to allow for recovery and  
524 virus expression.

## 525 **Stereotactic injection of viral vectors**

526 Six-week-old C57BL/6 mice (P35–45) were initially induced with ketamine (80 mg  $\text{kg}^{-1}$ ) and xylazine (10  
527 mg  $\text{kg}^{-1}$ ) and placed into a stereotaxic frame (David Kopf Instruments), before isoflurane anesthesia  
528 (~1% in  $\text{O}_2$ , v/v). A craniotomy (~1 mm in diameter) was made above the injection site. Virus  
529 suspensions were slowly injected (100 nl  $\text{min}^{-1}$ ) using a 34 G beveled needle (Nanofil syringe, World  
530 Precision Instruments). After injection, the needle was left in place for an additional 5 min and then  
531 slowly withdrawn. The surgical procedure was either continued with optic fiber or optrode drive  
532 implantations (described below), or the surgical incision was closed with tissue glue and 0.05 mg  $\text{kg}^{-1}$   
533 Buprenorphine was subcutaneously injected for post-surgical analgesia. Injections targeting the medial  
534 prefrontal cortex (mPFC) were made 1.8 mm anterior, 0.3 mm lateral and 2.53 mm ventral to bregma.  
535 Basolateral amygdala (BLA) injection coordinates were 1.15 mm posterior, 3.0 mm lateral and 5.0 mm  
536 ventral to bregma. For mPFC injections, 1  $\mu$ l of the indicated virus was injected. For fear extinction

537 experiments mice were bilaterally injected with 500 nl AAV2/1.CamKII $\alpha$ .stGtACR2-Fred.WPRE or  
538 AAV2/1.CamKII $\alpha$ .eYFP.WPRE with a genomic titer in the range of 2-3 x 10<sup>11</sup> vp ml<sup>-1</sup>.

### 539 **Optic fiber and Optrode drive implantation**

540 For fiber optic implantation, a craniotomy (~1 mm in diameter) was made above the implantation site  
541 and a ferrule-terminated optical fiber (ThorLabs) was placed at the desired coordinates using a  
542 stereotaxic frame (David Kopf Instruments). For bilateral BLA targeting, the fiber tip was placed 1.15 mm  
543 posterior, 3.0 mm lateral and 4.8 mm ventral to bregma. For nucleus accumbens, the fiber was  
544 implanted at a 45° angle with the ferrule pointing posterior to allow for optrode drive placement above  
545 the mPFC in the same animals. The fiber tip was aimed to terminate 1.42 mm anterior, 1 mm lateral and  
546 5 mm ventral to bregma. The optical fiber was secured to the skull using Metabond (Parkell) and dental  
547 acrylic. In mice trained for fear extinction learning additional dental acrylic was applied in a second  
548 session under isoflurane anesthesia (~1% in O<sub>2</sub>, v/v) after fear learning (day 2). For optrode drive  
549 implantation, the movable drive was lowered to an initial recording position above the PL (AP: 1.8 mm,  
550 ML: 0.3 mm, DV: -2.3 mm). Prior to the permanent attachment of the optrode to the skull, the optrode  
551 guide was protected with Kwik-Kast silicone elastomer (World Precision Instruments) and secured using  
552 dental acrylic. Mice were allowed to recover for at least 6 weeks before experiments. The locations of  
553 implanted optical fibers and optrodes were validated histologically for all experimental mice.

### 554 **Acute brain slice preparation**

555 Mice were injected intraperitoneally with pentobarbital (130 mg kg<sup>-1</sup>, i.p.) and perfused with  
556 carbogenated (95% O<sub>2</sub>, 5% CO<sub>2</sub>) ice-cold slicing solution ([mM] 2.5 KCl, 11 glucose, 234 sucrose, 26  
557 NaHCO<sub>3</sub>, 1.25 NaH<sub>2</sub>PO<sub>4</sub>, 10 MgSO<sub>4</sub>, 2 CaCl<sub>2</sub>; 340 mOsm). After decapitation, 300  $\mu$ m coronal mPFC  
558 slices were prepared in carbogenated ice-cold slicing solution using a vibratome (Leica VT 1200S) and  
559 allowed to recover for 20 min at 33°C in carbogenated high-osmolarity artificial cerebrospinal fluid  
560 (high-Osm ACSF; [mM] 3.2 KCl, 11.8 glucose, 132 NaCl, 27.9 NaHCO<sub>3</sub>, 1.34 NaH<sub>2</sub>PO<sub>4</sub>, 1.07 MgCl<sub>2</sub>, 2.14  
561 CaCl<sub>2</sub>; 320 mOsm) followed by 40 min incubation at 33°C in carbogenated ACSF ([mM] 3 KCl, 11 glucose,  
562 123 NaCl, 26 NaHCO<sub>3</sub>, 1.25 NaH<sub>2</sub>PO<sub>4</sub>, 1 MgCl<sub>2</sub>, 2 CaCl<sub>2</sub>; 300 mOsm). Subsequently, slices were kept at RT  
563 in carbogenated ACSF until use. The recording chamber was perfused with carbogenated ACSF at a rate  
564 of 2 ml min<sup>-1</sup> and maintained at 32°C.

### 565 **Electrophysiological methods for cell culture and acute brain slice recordings**

566 Whole-cell patch clamp recordings were performed under visual control using oblique illumination on a  
567 two-photon laser scanning microscope (Ultima IV, Bruker) equipped with a 12 bit monochrome CCD  
568 camera (QImaging QIClick-R-F-M-12). Borosilicate glass pipettes (Sutter Instrument BF100-58-10) with  
569 resistances ranging from 3–7 M $\Omega$  were pulled using a laser micropipette puller (Sutter Instrument Model  
570 P-2000). For hippocampal neuron cultures, electrophysiological recordings from neurons were obtained  
571 in Tyrode's medium ([mM] 150 NaCl, 4 KCl, 2 MgCl<sub>2</sub>, 2 CaCl<sub>2</sub>, 10 D-glucose, 10 HEPES; 320 mOsm; pH  
572 adjusted to 7.35 with NaOH), AcOH Tyrode's medium ([mM] 125 NaCl, 25 AcOH, 4 KCl, 2 MgCl<sub>2</sub>, 2 CaCl<sub>2</sub>,  
573 10 D-glucose, 10 HEPES; 320 mOsm; pH adjusted to 7.35 with NaOH). The recording chamber was  
574 perfused at 0.5 ml min<sup>-1</sup> and maintained at 29°C. Pipettes were filled using standard intracellular  
575 solution ([mM] 135 K-gluconate, 4 KCl, 2 NaCl, 10 HEPES, 4 EGTA, 4 MgATP, 0.3 NaGTP; 280 mOsm kg<sup>-1</sup>;  
576 pH adjusted to 7.3 with KOH) or an intracellular solution allowing for EPSC and IPSC recording ([mM] 120  
577 Cs-gluconate, 11 CsCl, 1 MgCl<sub>2</sub>, 1 CaCl<sub>2</sub>, 10 HEPES, 11 EGTA, 5 QX-314; 280 mOsm kg<sup>-1</sup>; pH adjusted to  
578 7.3 with CsOH). Whole-cell voltage clamp recordings were performed using a MultiClamp 700B  
579 amplifier, filtered at 8 kHz and digitized at 20 kHz using a Digidata 1440A digitizer (Molecular Devices).

#### 580 ***In vivo* optical silencing and electrophysiology**

581 All electrophysiological recordings in awake, freely moving mice were performed using an optrode drive  
582 consisting of an electrode bundle of 16 microwires (25  $\mu$ m diameter straightened tungsten wires;  
583 Wiretronic Inc.) attached to an 18 pin electrical connector, concentrically arranged around an optical  
584 fiber in a mechanically adjustable drive (Anikeeva et al., 2011<sup>64</sup>). Extracellular waveform signals were  
585 collected using the Digital Lynx integrated hardware and software system (Neuralynx Inc.). The electrical  
586 signal was filtered (600–6,000 Hz), amplified using a HS-18-CNR-LED unity-gain head-stage amplifier and  
587 digitized at 32 kHz. The electrode–fiber assembly was lowered using the mechanical drive to a new  
588 recording site at the end of each recording session, leaving at least 1.5 h before the next session to  
589 ensure stable recordings. Optical stimulation was applied through a ferrule-terminated optical fiber  
590 (ThorLabs) attached to the patch-chord by a zirconia sleeve (ThorLabs). For optical silencing of mPFC, we  
591 used a blue diode laser ( $\lambda$  = 460 nm, Omicron NanoTechnology). Light transmission for each optrode  
592 drive was measured with a calibrated power meter (ThorLabs) at the tip of the optical fiber at the end of  
593 the experiment. Light power was measured daily before experiments at the tip of the optical patch cord.  
594 Neural data were sorted manually using Off-Line Spike Sorter 3.2.4 (OFSS, Plexon) and analyzed in  
595 Matlab (MathWorks).

#### 596 ***In vivo* optogenetic silencing in mice during extinction training**

597 Mice in both the stGtACR2 and control group (eYFP expressing) were placed in the fear conditioning  
598 chamber (Med Associates) in context A. Mice were presented with five pairings of the CS (50 ms long 5  
599 kHz 84.4 dB tones, delivered at 10 Hz for 30 s) and US (continuous 0.5 mA foot shock for 1 s). Each CS  
600 coterminated with the US, with a 60 s interval between CS–US pairings. On day 3, mice were connected  
601 to the optical patch cord and then placed in a different chamber (context B). Context B differed from  
602 context A in the following aspects: odor (A: 1 % Acetic acid vs. B: 70 % EtOH), lighting (A: IR vs. B: IR +  
603 white light), box size (A: small, B: large), floor texture (A: grid, B: plain), wall texture (A: metal vs. B:  
604 Plexiglas), and background noise (A: none vs. B: fan). Mice were allowed 10 min of habituation and then  
605 presented with 20 repetitions of the CS, separated by 60 s intervals. The CS was paired with 5 mW blue  
606 light (447 nm) administered bilaterally from the fiber tip in both groups. To test extinction learning, mice  
607 were placed in context B on day 4 and presented with 20 repetitions of the CS, separated by 60 s  
608 intervals. Movies recorded at 25 frames per second were automatically scored for freezing on day 1 and  
609 4 by EthoVision XT 11.5 (Noldus) and by a custom written OpenCV-Python script. The number of  
610 changed pixels compared to the last frame was quantified and filtered by a Gaussian filter with 3 frames  
611 standard deviation. When mice were connected to optical patch cords, only changed pixels around the  
612 mouse body were considered, to discard patch cord motion. A mouse was considered to be freezing if  
613 38 consecutive values (1.5 s) were below 983 pixels (0.5% of all pixels, EthoVision) or 100 pixels (within  
614 the ROI around the mouse, OpenCV-Python script).

#### 615 **Immunofluorescence and microscopy**

616 Hippocampal neuronal cultures were fixed for 15 min with 4% paraformaldehyde in PBS. Coverslips were  
617 washed three times in PBS, incubated in blocking solution for 45 min (10% normal donkey serum (NDS)  
618 with 0.1% Triton in PBS) and then exposed over night at 4°C to monoclonal mouse anti-KCC2 primary  
619 antibody (diluted 1:1500 in 5% NDS, PBS; catalog # 167594 S1-12; USBiological) and rabbit anti-MAP2  
620 (diluted 1:1000 in 5% NDS, PBS; catalog # 4542S; Cell Signaling Technology). Following 3 washes in PBS,  
621 coverslips were incubated for 2 h at room temperature (RT) with a Cy5 Donkey Anti-Rabbit IgG (H+L)  
622 (diluted 1:500 in 5% NDS, PBS; catalog # 711-175-152; Jackson ImmunoResearch) and Cy3 Donkey Anti-  
623 Mouse IgG (H+L) (diluted 1:1000 in 5% NDS, PBS; catalog # 715-165-151; Jackson ImmunoResearch).  
624 Coverslips were then washed 2 times with PBS, dipped briefly into double-distilled water and embedded  
625 in DABCO mounting medium (Sigma). Immunostained neurons were imaged with a confocal scanning  
626 microscope (LSM 700, Carl Zeiss) using a 20 x objective for overview images (NA 0.8; Carl Zeiss) and a 63  
627 x oil immersion objective (NA 1.40; Carl Zeiss) for quantification. Mice were deeply anesthetized using

628 pentobarbital (0.4 mg g<sup>-1</sup> body weight) and perfused transcardially with ice-cold phosphate buffered  
629 saline (PBS, pH 7.4) followed by a solution of 4% paraformaldehyde (PFA) in PBS. After overnight  
630 postfixation at 4 °C, brains were removed from the skull and incubated overnight in 4% PFA in PBS.  
631 Brains were stored in to 30% sucrose in PBS for at least 24 h or until sectioning. Coronal sections (30 µm  
632 or 50 µm) were cut on a microtome (Leica Microsystems) and collected in cryoprotectant solution (25%  
633 glycerol, 30% ethylene glycol in PBS pH 6.7). Free-floating sections were mounted on gelatin-coated  
634 slides, dehydrated and embedded in DABCO mounting medium (Sigma). Images were acquired using a  
635 virtual slide scanner V (Olympus). Acquisition settings were kept constant within each experiment to  
636 allow for comparison between mice.

### 637 ***In vitro* illumination and drug application**

638 Whole-field illumination *in vitro* was performed using a 470 nm light emitting diode (29 nm bandwidth  
639 LED; M470L2-C2; Thorlabs) delivered through the microscope illumination path including a custom  
640 dichroic in order to reflect the 470 nm activation wavelength. Light power densities were calculated by  
641 measuring the light transmitted through the objective using a power meter (Thorlabs PM100A with  
642 S146C sensor) and dividing by the illumination area, calculated from the microscope objective field  
643 number and magnification<sup>65</sup>. D-AP5 (25 µM; ab120003; Abcam) and CNQX (10 µM; C-141, Alomone)  
644 were bath applied during all culture experiments. For spatially-restricted illumination of neuronal soma  
645 or neurites, a 473 nm diode laser (Bruker) was directed to the imaging plane with galvanometric mirrors,  
646 yielding a diffraction-limited spot of light that provided brief light pulses (1 ms) at each location, with  
647 500 ms inter-pulse intervals between non adjacent locations.

### 648 **Data analysis and statistical methods**

649 During whole-cell patch-clamp recordings, pClamp 10 software (Molecular Devices) was used for  
650 acquisition. Data was analyzed using custom scripts written in Matlab (Mathworks). To quantify  
651 postsynaptic current amplitudes in response to light pulses, holding current traces were filtered with a  
652 Savitzky-Golay 11 point, second order, Welch window function filter and the maximal change in holding  
653 current within 20 ms (EPSCs) after light delivery was determined. Fiji (based on ImageJ2; US National  
654 Institutes of Health) was used for immunofluorescence image analysis. In the KCC2 immunofluorescence  
655 experiment all numbers (n) refer to the number of imaged axons, in the targeting histology n refers to  
656 the number of mice, and in electrophysiological recordings, n refers to the number of recorded neurons  
657 / units. To detect significantly modulated units during *in vivo* silencing experiments, a paired-sample

658 student's t-test was performed comparing the number of detected action potentials between the 5 s  
659 pre-light period and the 5 s light period during 10 trials per light power. To detect antidromic spiking  
660 units, a paired-sample student's t-test was performed comparing the number of detected action  
661 potentials between the 20 ms pre-light period and the 20 ms light period starting with the 5 ms light  
662 pulse. All values are indicated as mean  $\pm$  SEM. Significance was determined at a significance level of 0.05  
663 with Tukey's honestly significant difference (HSD) *post hoc* test used to correct for multiple comparisons.  
664 In case of non-normal data distribution non-parametric tests were used: Mann–Whitney U test was used  
665 for a single comparisons, the Kruskal-Wallis H test for one-way analysis of variance, and the Scheirer Ray  
666 Hare test for two-way analysis of variance. No statistical tests were run to predetermine sample size, but  
667 sample sizes were similar to those commonly used in the field. Blinding and randomization were not  
668 performed; however automated analysis was used whenever possible.
